# Supplementary material for: Surveillance Study of Klebsiella pneumoniae in the Giant Panda Revealed High Genetic Diversity and Antibiotic Therapy Challenge
Source: MDPI journal article supplement (doi:10.3390/antibiotics11040473), 2022-04-01
Supplement: s1 [file s1]

**Table S1** Allele number and MLST types of 90 *K. pneumoniae*

| Panda code | Isolated time     | <i>gapA</i> | <i>infB</i> | <i>mdh</i> | <i>pgi</i> | <i>phoE</i> | <i>rpoB</i> | <i>tonB</i> | MLST |
|------------|-------------------|-------------|-------------|------------|------------|-------------|-------------|-------------|------|
| No. 09     | 18.05.28~18.05.31 | 2           | 1           | 1          | 1          | 3           | 1           | 9           | 1933 |
| No. 03     |                   | 2           | 1           | 62         | 1          | 10          | 4           | 110         | 2286 |
| No. 47     |                   | 2           | 1           | 1          | 2          | 2           | 1           | 43          | 4680 |
| No. 46     |                   | 2           | 1           | 1          | 1          | 9           | 1           | 93          | 323  |
| No. 21     |                   | 2           | 1           | 2          | 1          | 4           | 4           | 8           | 60   |
| No. 50     |                   | 2           | 9           | 2          | 1          | 13          | 45          | 16          | 37   |
| No. 05     |                   | 2           | 1           | 62         | 3          | 10          | 4           | 110         | 405  |
| No. 04     |                   | 2           | 1           | 1          | 1          | 9           | 4           | 4           | 631  |
| No. 52     |                   | 2           | 1           | 1          | 2          | 2           | 1           | 43          | 4680 |
| No. 07     |                   | 2           | 1           | 62         | 3          | 10          | 4           | 110         | 405  |
| No. 16     |                   | 2           | 2           | 2          | 1          | 1           | 4           | 34          | 1017 |
| No. 56     |                   | 4           | 114         | 1          | 1          | 13          | 70          | 12          | 4659 |
| No. 10     |                   | 2           | 115         | 114        | 166        | 2           | 146         | 140         | 2890 |
| No. 20     |                   | 2           | 3           | 2          | 2          | 6           | 4           | 4           | 29   |
| No. 01     |                   | 2           | 3           | 1          | 8          | 12          | 1           | 22          | 4790 |
| No. 22     |                   | 2           | 1           | 62         | 3          | 10          | 4           | 4           | 4845 |
| No. 02     |                   | 3           | 1           | 1          | 1          | 9           | 4           | 177         | 839  |
| No. 48     |                   | 2           | 9           | 2          | 1          | 13          | 1           | 38          | 896  |
| No. 14     |                   | 2           | 1           | 2          | 2          | 10          | 4           | 9           | 458  |
| No. 13     |                   | 2           | 1           | 2          | 1          | 12          | 1           | 68          | 200  |
| No. 51     |                   | 2           | 1           | 62         | 3          | 10          | 4           | 110         | 405  |
| No. 15     |                   | 2           | 1           | 2          | 1          | 12          | 1           | 68          | 200  |
| No. 23     |                   | 2           | 1           | 5          | 2          | 7           | 4           | 23          | 314  |
| No. 40     |                   | 16          | 18          | 43         | 49         | 47          | 30          | 75          | 2462 |
| No. 53     |                   | 2           | 1           | 1          | 2          | 2           | 1           | 43          | 4680 |
| No. 24     |                   | 2           | 1           | 1          | 2          | 2           | 1           | 43          | 4680 |
| No. 58     |                   | 38          | 19          | 53         | 58         | 73          | 21          | 130         | 526  |
| No. 54     |                   | 43          | 3           | 1          | 1          | 1           | 4           | 91          | 4881 |
| No. 55     |                   | 4           | 114         | 1          | 1          | 13          | 70          | 12          | 4659 |
| No. 57     |                   | 2           | 1           | 1          | 2          | 2           | 1           | 43          | 4680 |
| No. 08     |                   | 4           | 1           | 6          | 1          | 12          | 5           | 30          | 1558 |
| No. 11     |                   | 2           | 1           | 1          | 1          | 9           | 4           | 4           | 631  |
| No. 12     |                   | 16          | 24          | 36         | 27         | 29          | 22          | 105         | 1562 |
| No. 49     |                   | 2           | 1           | 62         | 3          | 10          | 4           | 4           | 4845 |
| No. 39     |                   | 4           | 1           | 6          | 1          | 12          | 5           | 30          | 1558 |
| No. 17     |                   | 2           | 1           | 62         | 3          | 10          | 4           | 110         | 405  |
| No. 06     | 18.9.11~18.9.14   | 16          | 1           | 21         | 76         | 47          | 22          | 152         | 615  |
| No. 06     |                   | 2           | 9           | 2          | 1          | 13          | 1           | 16          | 37   |
| No. 14     |                   | 2           | 9           | 2          | 1          | 13          | 1           | 16          | 37   |
| No. 19     |                   | 2           | 1           | 2          | 1          | 7           | 1           | 7           | 36   |
| No. 43     |                   | 2           | 1           | 2          | 4          | 9           | 1           | 16          | 39   |
| No. 15     |                   | 2           | 9           | 1          | 1          | 13          | 1           | 2           | 617  |
| No. 30     |                   | 120         | 9           | 2          | 1          | 13          | 1           | 16          | 4522 |
| No. 05     |                   | 4           | 1           | 2          | 1          | 1           | 4           | 62          | 983  |
| No. 38     |                   | 2           | 9           | 1          | 1          | 13          | 1           | 2           | 617  |
| No. 42     |                   | 10          | 3           | 2          | 1          | 4           | 1           | 4           | 1440 |
| No. 17     |                   | 2           | 1           | 65         | 1          | 10          | 11          | 2           | 1362 |
| No. 02     |                   | 2           | 1           | 1          | 2          | 16          | 4           | 337         | 2219 |
| No. 12     |                   | 18          | 22          | 18         | 16         | 25          | 13          | 165         | 1584 |
| No. 25     |                   | 4           | 3           | 1          | 36         | 9           | 10          | 14          | 661  |
| No. 27     |                   | 18          | 15          | 18         | 61         | 93          | 37          | 99          | 894  |
| No. 59     |                   | 18          | 15          | 18         | 22         | 31          | 13          | 51          | 1840 |
| No. 60     |                   | 2           | 5           | 118        | 1          | 179         | 1           | 13          | 1303 |
| No. 61     |                   | 2           | 1           | 1          | 1          | 7           | 2           | 12          | 1106 |
| No. 01     |                   | 2           | 1           | 1          | 1          | 4           | 4           | 4           | 17   |
| No. 62     |                   | 3           | 1           | 1          | 1          | 27          | 5           | 25          | 626  |
| No. 29     |                   | 2           | 5           | 118        | 1          | 10          | 1           | 13          | 1886 |
| No. 09     |                   | 18          | 15          | 18         | 61         | 93          | 37          | 99          | 894  |
| No. 11     |                   | 2           | 3           | 1          | 8          | 12          | 1           | 22          | 4790 |
| No. 31     |                   | 2           | 3           | 2          | 1          | 7           | 4           | 12          | 2938 |
| No. 32     |                   | 2           | 1           | 1          | 1          | 48          | 1           | 46          | 4683 |
| No. 37     |                   | 18          | 15          | 18         | 22         | 31          | 13          | 51          | 1840 |
| No. 33     |                   | 4           | 5           | 1          | 3          | 12          | 4           | 46          | 1078 |
| No. 18     |                   | 2           | 1           | 2          | 1          | 1           | 7           | 13          | 403  |
| No. 03     |                   | 2           | 1           | 2          | 1          | 7           | 45          | 7           | 36   |

|        |                   |    |     |     |     |    |     |     |      |
|--------|-------------------|----|-----|-----|-----|----|-----|-----|------|
| No. 26 |                   | 2  | 1   | 1   | 17  | 4  | 16  | 4   | 774  |
| No. 07 |                   | 2  | 9   | 2   | 1   | 13 | 1   | 10  | 309  |
| No. 16 |                   | 2  | 3   | 2   | 1   | 7  | 4   | 12  | 2938 |
| No. 44 |                   | 4  | 3   | 1   | 36  | 9  | 10  | 14  | 661  |
| No. 04 |                   | 6  | 3   | 1   | 1   | 12 | 45  | 4   | 12   |
| No. 28 |                   | 6  | 3   | 1   | 1   | 12 | 45  | 4   | 12   |
| No. 08 |                   | 2  | 1   | 2   | 1   | 1  | 1   | 7   | 298  |
| No. 41 |                   | 2  | 51  | 1   | 4   | 17 | 15  | 355 | 2473 |
| No. 10 |                   | 2  | 6   | 1   | 3   | 8  | 1   | 44  | 110  |
| No. 13 |                   | 4  | 3   | 1   | 36  | 9  | 10  | 14  | 661  |
| No. 63 |                   | 2  | 1   | 1   | 1   | 4  | 4   | 4   | 17   |
| No. 34 |                   | 2  | 1   | 33  | 1   | 1  | 4   | 56  | 730  |
| No. 35 | 18.12.12~18.12.14 | 2  | 3   | 1   | 1   | 56 | 1   | 110 | 13   |
| No. 39 |                   | 2  | 1   | 2   | 1   | 4  | 4   | 8   | 60   |
| No. 03 |                   | 2  | 1   | 2   | 1   | 4  | 4   | 8   | 60   |
| No. 37 |                   | 2  | 1   | 2   | 1   | 9  | 1   | 112 | 412  |
| No. 18 |                   | 2  | 1   | 1   | 1   | 4  | 4   | 4   | 17   |
| No. 01 |                   | 16 | 115 | 370 | 166 | 47 | 146 | 606 | 2368 |
| No. 07 |                   | 2  | 3   | 2   | 2   | 6  | 4   | 4   | 29   |
| No. 19 |                   | 3  | 5   | 1   | 134 | 10 | 4   | 4   | 1798 |
| No. 05 |                   | 3  | 5   | 1   | 134 | 10 | 4   | 4   | 1798 |
| No. 04 |                   | 3  | 5   | 1   | 134 | 10 | 4   | 4   | 1798 |
| No. 06 |                   | 2  | 1   | 2   | 17  | 27 | 1   | 39  | 107  |
| No. 02 |                   | 2  | 1   | 4   | 14  | 1  | 5   | 30  | 1558 |
| No. 38 |                   | 2  | 1   | 4   | 14  | 1  | 5   | 30  | 1558 |

**Table S2** Primer sequence information of housekeeping gene of *K. pneumoniae*

| Housekeeping Gene                        | abbreviate | Primer Sequence                                                   | Length (bp) |
|------------------------------------------|------------|-------------------------------------------------------------------|-------------|
| beta-subunit of RNA polymerase           | rpoB       | F: Vic3oF: GTTTTCCCAGTCACGACGTTGTAGGCGAAATGGCWGAGAACCA            | 501         |
|                                          |            | R: Vic2oR: TTGTGAGCGGATAACAATTTTCGAGTCTTCGAAGTTGTAACC             |             |
| glyceraldehyde 3-phosphate dehydrogenase | gapA       | F: gapA173oF: GTTTTCCCAGTCACGACGTTGTATGAAATATGACTCCACTCACGG       | 450         |
|                                          |            | R: gapA181oR: TTGTGAGCGGATAACAATTTCTTCAGAAAGCGGCTTTGATGGCTT       |             |
| malate dehydrogenase                     | mdh        | F: mdh130oF: GTTTTCCCAGTCACGACGTTGTACCCAACCTCGCTTCAGGTTTCAG       | 477         |
|                                          |            | R: mdh867oR: TTGTGAGCGGATAACAATTTCCCGTTTTTCCCCAGCAGCAG            |             |
| phosphoglucose isomerase                 | pgi        | F: pgi1FoF: GTTTTCCCAGTCACGACGTTGTAGAGAAAAACCTGCCTGTACTGCTGGC     | 432         |
|                                          |            | R: pgi1RoR: TTGTGAGCGGATAACAATTTCCGCGCCACGCTTTATAGCGGTTAAT        |             |
| phosphorine E                            | phoE       | F: phoE604.1oF: GTTTTCCCAGTCACGACGTTGTAACCTACCGCAACACCGACTTCTTCGG | 420         |
|                                          |            | R: phoE604.2oR: TTGTGAGCGGATAACAATTTCTGATCAGAACTGGTAGGTGAT        |             |
| translation initiation fact or 2         | infB       | F: infB1FoF: GTTTTCCCAGTCACGACGTTGTACTCGCTGCTGGACTATATTCG         | 318         |
|                                          |            | R: infB1RoR: TTGTGAGCGGATAACAATTTCCGCTTTCAGCTCAAGAACTTC           |             |
| periplasmic energy transducer            | tonB       | F: tonB1FoF: GTTTTCCCAGTCACGACGTTGTACTTTATACCTCGGTACATCAGGTT      | 414         |
|                                          |            | R: tonB2RoR: TTGTGAGCGGATAACAATTTTCATTCGCCGGCTGRGCRGAGAG          |             |

**Table S3** Determination criteria for antibiotic resistance profiles

| Types           | Antibiotics                     | Content (μg/tablet) | Diameter (mm)  |                  |                 |
|-----------------|---------------------------------|---------------------|----------------|------------------|-----------------|
|                 |                                 |                     | Resistance (R) | Intermediate (I) | Sensitivity (S) |
| β-lactams       | cefotaxime (CTX)                | 30                  | ≤14            | 15-17            | ≥18             |
|                 | cefaclor (CEC)                  | 30                  | ≤14            | 15-17            | ≥18             |
|                 | meropenem (MEM)                 | 10                  | ≤28            | 29-37            | ≥38             |
|                 | Cefradine (CE)                  | 30                  | ≤14            | 15-17            | ≥18             |
|                 | ampicillin (AMP)                | 10                  | ≤13            | 14-16            | ≥17             |
| Aminoglycosides | Amikacin (AK)                   | 30                  | ≤14            | 15-16            | ≥17             |
|                 | neomycin (N)                    | 30                  | ≤12            | 13-16            | ≥17             |
| Quinolones      | Ciprofloxacin (CIP)             | 5                   | ≤15            | 16-22            | ≥23             |
|                 | enrofloxacin (ENR)              | 10                  | ≤21            | 22-28            | ≥29             |
| Tetracyclines   | tetracycline (TE)               | 30                  | ≤14            | 15-18            | ≥19             |
|                 | doxycycline (DOX)               | 30                  | ≤12            | 13-15            | ≥16             |
| Others          | Compound sulfamethoxazole (SXT) | 24                  | ≤23            | 24-32            | ≥33             |
|                 | rifampicin (RD)                 | 5                   | ≤16            | 17-19            | ≥20             |
|                 | azithromycin (AZM)              | 15                  | ≤13            | 14-17            | ≥18             |

|                   |     |     |       |     |
|-------------------|-----|-----|-------|-----|
| Florfenicol (FON) | 30  | ≤12 | 13-17 | ≥18 |
| Polymyxin B (PB)  | 300 | ≤7  | 8-11  | ≥12 |

**Table S4** Primers information of antibiotic resistance genes (ARGs)

| Classification | Gene                            | Forward primer                | Reverse primer                |
|----------------|---------------------------------|-------------------------------|-------------------------------|
| aminoglycoside | <i>aac</i>                      | CCCTGCGTTGTGGCTATGT           | TGGCCACGCCAATCC               |
| aminoglycoside | <i>aac(3)-I</i>                 | ACCTACTCCCAACATCAGCC          | ATATAGATCTCACTACGCGC          |
| aminoglycoside | <i>aac(6')I1</i>                | GACCGGATTAAGGCCGATG           | CTTGCCITGATATTCAGTTTTTATAACCA |
| aminoglycoside | <i>aac(6')-Ib(aka aacA4)-01</i> | GTTTGAGAGGCAAGGTACCGTAA       | GAATGCCTGGCGTGTGTTGA          |
| aminoglycoside | <i>aac(6')-Ib(aka aacA4)-02</i> | CGTCGCCGAGCAACTTG             | CGGTACCTTGCCCTCTCAAACC        |
| aminoglycoside | <i>aac(6')-Ib(aka aacA4)-03</i> | AGAAGCACGCCCGACACTT           | GCTCTCCATTTCAGCATTGCA         |
| aminoglycoside | <i>aac(6')-II</i>               | CGACCCGACTCCGAACAA            | GCACGAATCCTGCCTTCTCA          |
| aminoglycoside | <i>aac(6')-Iy</i>               | GCTTTGCGGATGCCTCAAT           | GGAGAACAAAAATACCTTCAAGGAAA    |
| aminoglycoside | <i>ant (3')-I</i>               | TGATTTGCTGGTTACGGTGAC         | CGCTATGTTCTCTTGCTTTTC         |
| aminoglycoside | <i>aph</i>                      | TTTCAGCAAGTTGGATCATGTTAAAAAT  | CCAAGCTGTTTCCACTGTTTTTC       |
| aminoglycoside | <i>aph(2')-Id-01</i>            | TGAGCAGTATCATAAGTTGAGTGAAAAAG | GACAGAACAATCAATCTCTATGGAATG   |
| aminoglycoside | <i>aph6ia</i>                   | CCCATCCCATGTGTAAGGAAA         | GCCACCGCTTCTGCTGTAC           |
| aminoglycoside | <i>aphA1(aka kanR)</i>          | TGAACAAGTCTGGAAAGAAATGCA      | CCTATTAATTTCCCTCTCGTCAAAAA    |
| aminoglycoside | <i>aphA3-01</i>                 | TGACGATCCGAGGAGTATC           | AGCTGGTGAACGTACTAC            |
| aminoglycoside | <i>aphA3-02</i>                 | CAATCGGATCGTCAAGCGATC         | ATGCTACTTGAGCTTAGGCGAAA       |
| fca            | <i>acrA-03</i>                  | CAGACCCGATCGCATATT            | CGACAATTTCCGCTCATG            |
| integron       | <i>intl-1</i>                   | CGAACGAGTGCGCGAGGGTG          | TACCCGAGAGCTTGGCACCCA         |
| integron       | <i>Int12-01</i>                 | GACGAATAATCGTGACGACGAT        | ACTTTCTCGGTCTGCCATGAG         |
| integron       | <i>Int12-02</i>                 | AACGTAGCTCTGAAAACGCAGTT       | TATGTGACCTGGCGATGATTGAC       |
| integron       | <i>Int13-01</i>                 | CCGAAAAGAAGGGATTAAGCGAG       | AACGGTTTACGGAACGTACGACC       |
| integron       | <i>Int13-02</i>                 | ATCGGAAATCGATTCCGACT          | ATGGCAATCGATCGAATTCA          |
| MLSB           | <i>ermA</i>                     | TTGAGAAGGGGATTGCGAAAAAG       | ATATCCATCTCCACCATAATAGTAAACC  |
| MLSB           | <i>ermB</i>                     | TAAAGGGCATTTAACGACGAAACT      | TTTATACCTCTGTTGTAGGGAATTGAA   |
| MLSB           | <i>ermC</i>                     | TTTGAAATCGGCTCAGGAAAA         | ATGGTCTATTTCATGGCAGTTACG      |
| MLSB           | <i>mcr1</i>                     | CGCGATGCTACTGATACCA           | GGTCGTATCATAGACCGTGCC         |
| MLSB           | <i>mcr2</i>                     | AATCGTACCCAAGTAATC            | TAGGCTGAAACTGTCTAAATCG        |
| MLSB           | <i>msrA-01</i>                  | CTGCTAACACAAGTACGATTCCAAAT    | TCAAGTAAAGTTGTCTTACCTACACCATT |
| other          | <i>IS26</i>                     | TACCGTAAGGCTACAACGT           | AACTGAGCTAGCTCCTTTACGGC       |
| other          | <i>IS3</i>                      | TCCGGCTAGTCAATTTCGGACCGA      | TACGTAAAGGCTAGCTTACG          |
| other          | <i>IS613</i>                    | AGGTTTCGGACTCAATGCAACA        | TTCAGCACATACCGCCTTGAT         |
| other          | <i>ISCR1</i>                    | ACTGGCAAACGGTCATCG            | ACTGTCCGATCCCTTACTGAAACT      |
| other/efflux   | <i>qacA</i>                     | TGGCAATAGGAGCTATGGTGTTT       | AAGGTAACACTATTTTCGGTCCAAATC   |
| other/efflux   | <i>qacEdelta1-01</i>            | TCGCAACATCCGCATTAAAA          | ATGGATTTTCAAGAACAGAGAAAGAAA   |
| other/efflux   | <i>qacEdelta1-02</i>            | CCCCTTCCGCCGTTGT              | CGACCAGACTGCATAAGCAACA        |
| other/efflux   | <i>qacH-01</i>                  | GTGGCAGCTATCGCTTGGAT          | CCAACGAACGCCACAA              |
| other/efflux   | <i>qacH-02</i>                  | GTGGCAGCTATCGCTTGGAT          | TGAACGCCCAGAAGCTAGTTTTT       |
| quinilone      | <i>acrA-01</i>                  | CAACGATCGGACGGGTTTC           | TGGCGATGCCACCGTACT            |
| quinilone      | <i>acrA-02</i>                  | GGTCTATCACCTACGCGCTATC        | GCGCGCACGAACATACC             |
| quinilone      | <i>acrB-01</i>                  | AGTCGGTGTTTCGCCGTTAAC         | CAAGGAAACGAACGCAATACC         |
| quinilone      | <i>qnrA</i>                     | AGGATTTCTCACGCCAGGATT         | CCGCTTTCAATGAAACTGCCAA        |
| tetracycline   | <i>tcrB</i>                     | GCAACTGCTAGTACGCTTAACG        | GGCATGTGGTCAAGCCTTAC          |
| tetracycline   | <i>tetA-01</i>                  | GCTGTTTGTTCTGCCGAAA           | GGTTAAGTTCCTTGAACGCAAACT      |
| tetracycline   | <i>tetA-02</i>                  | CTCACCAGCCTGACCTCGAT          | CACGTTGTTATAGAAGCCGCATAG      |
| tetracycline   | <i>tetB-01</i>                  | AGTGCGCTTTGGATGCTGTA          | AGCCCCAGTAGCTCCTGTGA          |
| tetracycline   | <i>tetB-02</i>                  | GCCCAGTGCTGTTGTGTCAT          | TGAAAGCAAACGGCCTAAATACA       |
| vancomycin     | <i>vanA</i>                     | AAAAGGCTCTGAAAACGCAGTTAT      | CGGCCGTTATCTTGTA AAAACAT      |
| vancomycin     | <i>vanB-01</i>                  | TTGTCCGCGAAGTGGATCA           | AGCCTTTTTCCGGCTCGTT           |
| vancomycin     | <i>vanC-01</i>                  | ACAGGGATTGGCTATGAACCAT        | TGACTGGCGATGATTTGACTATG       |
| β-lactamase    | <i>blaCMY2-01</i>               | AAAGCCTCAT GGGTGCAATAA        | ATAGCTTTTGTGTTGCCAGCATCA      |
| β-lactamase    | <i>blaCMY2-02</i>               | GCGAGCAGCCTGAAGCA             | CGGATGGGCTTGTCCTCTT           |
| β-lactamase    | <i>blaCTX-M-01</i>              | GGAGGCGTGACGGCTTTT            | TTCAGTGCGATCCAGACGAA          |
| β-lactamase    | <i>blaCTX-M-02</i>              | GCCGCGGTGCTGAAGA              | ATCGGATTATAGTTAACAGGTCAGATT   |
| β-lactamase    | <i>blaCTX-M-03</i>              | CGATACCACCACGCCGTTA           | GCATTGCCCAACGTGAGATT          |
| β-lactamase    | <i>blaCTX-M-04</i>              | CTTGCGGTTGCGGTGAT             | CGTTCATCGGCACGGTAGA           |
| β-lactamase    | <i>blaCTX-M-05</i>              | GCGATAACGTGGCGATGAAT          | GTCGAGACGGAACGTTTCGT          |
| β-lactamase    | <i>blaCTX-M-06</i>              | CACAGTTGGTGACGTGGCTTAA        | CTCCGCTGCCGGTTTTATC           |
| β-lactamase    | <i>blaGES</i>                   | GCAATGTGCTCAACGTTC AAG        | GTGCTGAGTCAATTCTTTCAAAG       |
| β-lactamase    | <i>blaIMP-01</i>                | AACACGGTTTGGTGGTTCTTGTA       | GCGCTCCACAAACCAATTG           |
| β-lactamase    | <i>blaKPC</i>                   | ATGTCACTGTATCGCCGTCTA         | TACTGCCCGTTGACGCCCAA          |
| β-lactamase    | <i>blaMOX/blaCMY</i>            | CTATGTCAATGTGCCGAAGCA         | GGCTTGCTCTCTTCGAATAGC         |
| β-lactamase    | <i>BlaNDM</i>                   | CTTGAGGTTGCTTGCCG             | AGCGTCAGAAATTGCCCATAC         |

|             |                         |                         |                               |
|-------------|-------------------------|-------------------------|-------------------------------|
| β-lactamase | <i>blaOCH</i>           | GGCGACTTGCGCCGTAT       | TTTTCTGCTCGGCCATGAG           |
| β-lactamase | <i>blaOXA1/blaOXA30</i> | CGGATGGTTTGAAGGGTTATTAT | TCTTGGCTTTTATGCTTGATGTAA      |
| β-lactamase | <i>blaOXA10-01</i>      | CGCAATTATCGGCCTAGAAACT  | TGGCTTTCCGTCCCATTT            |
| β-lactamase | <i>blaOXA10-02</i>      | CGCAATTATCGGCCTAGAAACT  | TGGCTTTCCGTCCCATTT            |
| β-lactamase | <i>blaOXY</i>           | CGTTCAGGCGGCAGGT        | GCCGCGATATAAGATTTGAGAATT      |
| β-lactamase | <i>blaPER</i>           | TGCTGGTTGCTGTTTTGTGA    | CCTGCGCAATGATAGCTTCAT         |
| β-lactamase | <i>blaSHV-01</i>        | TCCCATGATGAGCACCTTTAAA  | TTCGTCACCGGCATCCA             |
| β-lactamase | <i>blaSHV-02</i>        | CTTCCCATGATGAGCACCTTT   | TCCTGCTGGCGATAGTGGAT          |
| β-lactamase | <i>blaTEM</i>           | AGCATCTTACGGATGGCATGA   | TCCTCCGATCGTTGTCAGAAAGT       |
| β-lactamase | <i>blaVEB</i>           | CCCGATGCAAAGCGTTATG     | GAAAGATTCCCTTTATCTATCTCAGACAA |
| β-lactamase | <i>blaVIM</i>           | GCACTTCTCGCGGAGATTG     | CGACGGTGATGCGTACGTT           |
